1 **Novel Paju Apodemus Paramyxovirus 1 and 2, Harbored by**  
2 ***Apodemus agrarius* in The Republic of Korea**

3  
4 Seung-Ho Lee,<sup>a</sup> Jin Sun No,<sup>a,\*</sup> Kijin Kim,<sup>a,\*\*</sup> Shailesh Budhathoki,<sup>b</sup> Kyungmin Park,<sup>a,c</sup> Geum  
5 Young Lee,<sup>a</sup> Seungchan Cho,<sup>a</sup> Hyeok Sun Choi,<sup>d</sup> Bong-Hyun Kim,<sup>e</sup> Seunghee Cho,<sup>e</sup> Jong Woo  
6 Kim,<sup>a</sup> Jin Gyeong Lee,<sup>a</sup> Seung Hye Cho,<sup>f</sup> Heung-Chul Kim,<sup>g</sup> Terry A. Klein,<sup>g</sup> Chang-Sub  
7 Uhm,<sup>h</sup> Won-Keun Kim,<sup>b,d,#</sup> Jin-Won Song<sup>a,c,#</sup>

8  
9 <sup>a</sup>Department of Microbiology, Korea University College of Medicine, Seoul, Republic of  
10 Korea

11 <sup>b</sup>Department of Microbiology, College of Medicine, Hallym University, Chuncheon, Republic  
12 of Korea

13 <sup>c</sup>BK21 Graduate Program, Department of Biomedical Sciences, Korea University College of  
14 Medicine, Seoul, Republic of Korea

15 <sup>d</sup>Institute of Medical Science, College of Medicine, Hallym University, Chuncheon, Republic  
16 of Korea

17 <sup>e</sup>AAVATAR Therapeutics, Incheon, Republic of Korea

18 <sup>f</sup>Department of Biomedical Science, College of Natural Sciences, Hallym University,  
19 Chuncheon, Republic of Korea

20 <sup>g</sup>Force Health Protection and Preventive Medicine, Medical Department Activity-Korea/65<sup>th</sup>  
21 Medical Brigade, Unit 15281, APO AP 96271-5281, USA

22 <sup>h</sup>Department of Anatomy, Korea University College of Medicine, Seoul, Republic of Korea  
23  
24

25 Running Head: Identification of Novel Paramyxovirus in Rodent

26

27

28 #Address correspondence to Jin-Won Song, [jwsong@korea.ac.kr](mailto:jwsong@korea.ac.kr) and Won-Keun Kim,  
29 [wkkim1061@hallym.ac.kr](mailto:wkkim1061@hallym.ac.kr)

30 \*Present address: Division of High-risk Pathogens, Bureau of Infectious Diseases Diagnosis  
31 Control, Korea Disease Control and Prevention Agency, Cheongju 28159, Republic of Korea

32 \*\*Present address: Saarland University Saarbrücken Campus, Saarbrücken, Germany

33 Seung-Ho Lee and Jin Sun No contributed equally to this work.

## 34 **Abstract**

35 Paramyxoviruses, negative-sense single-stranded RNA viruses, pose a potential threat to public  
36 health. Currently, 78 species and 17 genera of paramyxoviruses are classified and harbored by  
37 multiple natural reservoirs, including rodents, bats, birds, reptiles, and fish. *Jeilongvirus* has  
38 been proposed as a novel paramyxovirus genus containing J-, Beilong, and Tailam viruses,  
39 found in wild rodents. Using RT-PCR, 824 *Apodemus agrarius* individuals were examined for  
40 the prevalence of paramyxovirus infections. Paramyxovirus RNA was detected in 108 (13.1%)  
41 rodents captured at 14 trapping sites in Korea. We first present two genetically distinct novel  
42 paramyxoviruses (genus *Jeilongvirus*), Paju Apodemus paramyxoviruses 1 (PAPV-1) and 2  
43 (PAPV-2), from *A. agrarius*. Six PAPV strains were completely sequenced using next-  
44 generation and Sanger sequencing. PAPV-1 genome comprised 19,716 nucleotides, with eight  
45 genes (3'-N-P/V/C-M-F-SH-TM-G-L-5'), whereas PAPV-2 genome contained 17,475  
46 nucleotides, with seven genes (3'-N-P/V/C-M-F-TM-G-L-5'). The disparity between PAPV-1  
47 and -2 revealed the presence of the *SH* gene and length of the *G* gene in the genome  
48 organization. The phylogenies of PAPV-1 and -2 belong to distinct genetic lineages of  
49 *Jeilongvirus* despite being from the same natural host. PAPV-1 clustered with Beilong and  
50 Tailam viruses, while PAPV-2 formed a genetic lineage with Mount Mabu Lophuromys virus-  
51 1. PAPV-1 infected human epithelial and endothelial cells, facilitating the induction of type  
52 I/III interferons, interferon-stimulated genes, and proinflammatory cytokines. Therefore, this  
53 study provides profound insights into the molecular epidemiology, virus-host interactions, and  
54 zoonotic potential of novel rodent-borne paramyxoviruses.

55

## 56 **Importance**

57 Paramyxoviruses are a critical public health and socio-economic burden to humans. Rodents  
58 play a crucial role in transmitting pathogens to humans. In the last decade, novel

59 paramyxoviruses have been discovered in different rodents. Here, we found that *Apodemus*  
60 *agrarius* harbored two distinct genotypes of the novel paramyxoviruses, Paju Apodemus  
61 paramyxovirus 1 (PAPV-1) and 2 (PAPV-2), possessing unique genome structures that are  
62 responsible for encoding TM and G proteins of different sizes. In addition, PAPV-1 infected  
63 human epithelial and endothelial cells, facilitating the induction of type I/III IFNs, ISGs, and  
64 proinflammatory cytokines. Thus, this study provides significant insights into molecular  
65 prevalence, virus-host interactions of paramyxoviruses. These observations raise the awareness  
66 of physicians and scientists about the emergence of new rodent-borne paramyxoviruses.

67

68 **Keywords (Maximum 6):** Rodent paramyxovirus, *Apodemus agrarius*, Paju Apodemus  
69 paramyxovirus 1, Paju Apodemus paramyxovirus 2, phylogenetic diversity

## 70 **Introduction**

71 Zoonotic diseases, transmitted from reservoir hosts to humans, comprise the majority of  
72 emerging and re-emerging infectious diseases and are public health and socio-economic threats  
73 (1-3). Emerging outbreaks of zoonotic viruses, such as severe acute respiratory syndrome  
74 coronavirus 2, have increased recently because of expanding human activities that have  
75 enabled virus spillover, particularly in situations that facilitate close contact among diverse  
76 wildlife species, domesticated animals, and humans (4). Rodents serve as potential mammalian  
77 hosts and pose the highest risk of harboring zoonotic viruses to date (3). These animals cause  
78 significant economic losses in agriculture and transmit infectious agents including viruses,  
79 bacteria, and parasites that cause hemorrhagic fever, tsutsugamushi disease, and leptospirosis  
80 (5, 6). Among the rodents in Asia and Europe, *Apodemus* species is a natural reservoir host  
81 carrying pathogens that are detrimental to humans, and *A. agrarius* is widely distributed in  
82 various natural environments (e.g., rural areas, agricultural fields, and forests). Metagenomic  
83 studies and continuous surveillance of potential viruses in small mammals provided clues for  
84 preventive and mitigative strategies against new emerging and re-emerging infectious diseases  
85 (7-12).

86 Paramyxoviruses are non-segmented, negative-sense single-stranded RNA viruses.  
87 *Paramyxoviridae* is divided into four subfamilies: *Avulavirinae*, *Rubularvirinae*,  
88 *Metaparamyxovirinae*, and *Orthoparamyxovirinae*. *Orthoparamyxovirinae* is classified into  
89 nine genera: *Respirovirus*, *Aquaparamyxovirus*, *Fetavirus*, *Henipavirus*, *Jeilongvirus*,  
90 *Narmovirus*, *Salemvirus*, *Sunshinevirus*, and *Morbillivirus* (13). Paramyxoviruses have a wide  
91 host range, including vertebrates (mammals, birds, reptiles, and fish) (14). Some  
92 paramyxoviruses, for example, human parainfluenza, Hendra, Nipah (NiV), mumps, and  
93 measles viruses, pose critical public health and socio-economic burdens owing to their  
94 pathogenicity in humans.

95 The newly established genus *Jeilongvirus* has been identified in all rodents, and it consists of  
96 seven recognized species, J-virus (JV) (15), Beilong virus (BeiV) (16), Tailam virus (TaiV)  
97 (17), Mount Mabu Lophuromys virus 1 (MMLV-1) and 2 (MMLV-2), Shaan virus, and  
98 Pohorje Myodes paramyxovirus 1 (PMPV-1) (18). In 1972, JV was isolated from the kidney  
99 auticulture of a moribund house mouse (*Mus musculus*) captured in northern Queensland,  
100 Australia (19). BeiV was first identified in a human mesangial cell line (16). In 2012, the  
101 presence of BeiV was confirmed in the kidney and spleen tissues of brown (*Rattus norvegicus*)  
102 and black (*Rattus rattus*) rats in Hong Kong (20). TaiV was isolated from the kidney and spleen  
103 tissues of Sikkim rats (*Rattus andamanensis*) at the Tai Lam country park in Hong Kong (17).  
104 MMLV-1 and -2 were discovered in the kidney of a Rungwe brush-furred rat (*Lophuromys*  
105 *machangui*) in Mozambique, and PMPV-1 was found in the kidney of a bank vole (*Myodes*  
106 *glareolus*) in Slovenia (18). These viruses possess two additional transcription units encoding  
107 the small hydrophobic (SH) and transmembrane (TM) proteins between the fusion (F) and  
108 receptor binding protein genes, with the exception of MMLV-1 and -2, which contain the *TM*  
109 gene but not the *SH* gene. In a previous study, paramyxovirus SH proteins were found to  
110 modulate the *in vitro* expressions of proinflammatory cytokines interleukin 6 (IL-6) and IL-8  
111 via nuclear factor- $\kappa$ B (NF- $\kappa$ B) activation (21). In particular, the SH protein of JV inhibited  
112 tumor necrosis factor- $\alpha$  (TNF- $\alpha$ ) production and apoptosis *in vitro* and *in vivo* (22-24).  
113 However, the pathogenicity of these Jeilongviruses remains unexplored in humans.  
114 In this study, 824 *A. agrarius* individuals were collected at 14 trapping sites and investigated  
115 for the prevalence, phylogenetic diversity, and genomic characterization of novel Paju  
116 Apodemus paramyxoviruses (PAPVs), PAPV-1 and -2, in the Republic of Korea (ROK).  
117 PAPV-1 infected human cells and induced the expression of type I/III interferons (IFNs),  
118 interferon-stimulated genes (ISGs), and proinflammatory cytokines. Thus, this study provides

119 significant insights into the genetic diversity, evolutionary dynamics, and virus-host  
120 interactions of novel rodent-borne paramyxoviruses.

121

## 122 **Results**

### 123 **Molecular screening and isolation of PAPVs in rodents**

124 A total of 824 *A. agrarius* individuals were captured in various regions of the ROK from 2016  
125 to 2018 (**Figure S1**). Paramyxovirus RNA was detected in 81/824 (9.8%) *A. agrarius*  
126 individuals using specific primers targeting the genera *Respirovirus*, *Morbillivirus*, and  
127 *Henipavirus* (14,287–14,725 nt). Viral RNA was detected in 59/824 (7.2%) rodents via RT-  
128 PCR by targeting pan-*Orthoparamyxovirinae* (15,369–15,898 nt) (**Table S1**). In total, 108  
129 (13.1%) *A. agrarius* individuals were positive for paramyxovirus (**Table 1**). The prevalence of  
130 PAPV-1 was 87/824 (10.6%), whereas that of PAPV-2 was 21/824 (2.6%) ( $P < 0.001$  in Fisher's  
131 exact test). The geographic prevalence of PAPV was as follows: 39/361 (10.8%) in Gangwon  
132 Province, 63/434 (14.5%) in Gyeonggi Province, 1/6 (16.7%) in Gyeongsangnam Province,  
133 and 5/23 (21.7%) in Chungcheongnam Province (**Table S2**). The rodent-borne paramyxovirus,  
134 PAPV, was first identified in *A. agrarius* captured in Paju, ROK. Among 370 male and 453  
135 female *A. agrarius*, 56 (15.1%) and 52 (11.5%) harbored PAPV, respectively, indicating the  
136 gender-specific prevalence of this virus. Adult and old *A. agrarius* (20–30 g and 31–40 g,  
137 respectively) showed PAPV infection rates of 18.1% (45 animals) and 22.4% (34 animals),  
138 respectively, whereas the juvenile and subadult animals (<20.0 g) showed low PAPV infection  
139 rates (6.7% and 4.5%, respectively). PAPV-positive rodents were found in spring, summer,  
140 autumn, and winter.

141 *A. agrarius*-borne paramyxovirus was isolated from the kidney tissues of Aa17-179 and Aa17-  
142 297 using a cell culture-based method. The paramyxovirus isolates from the infected rodents  
143 showed a cytopathic effect of syncytia formation (not shown) in Vero E6 cells. The first isolate

144 of PAPV-1 was confirmed by passaging two times for 14 days post-inoculation. The particles  
145 of PAPV-1 were observed using a transmission electron microscope (**Figure 1A**). In addition,  
146 the number of infectious PAPV particles was  $3 \times 10^5$  PFU/mL, quantified using the plaque assay  
147 (**Figure 1B**).

#### 148 **Whole-genome sequencing of PAPVs using next generation sequencing (NGS) and rapid** 149 **amplification of cDNA ends (RACE) PCR**

150 To obtain whole-genome sequences of PAPV, sequence-independent, single-primer  
151 amplification-based MiSeq of the Aa17-179 and Aa17-297 isolates generated eight contigs  
152 (520–976 nt in length) with significant similarities to the genomic sequence of  
153 paramyxoviruses. The NGS of Aa17-179 and Aa17-297 generated 1,623,052 and 1,479,714  
154 viral reads, respectively, and the depth of the viral genome sequence was 144,317 and 79,344,  
155 respectively (**Table S3**). The nearly complete genome sequences of four PAPV strains (Aa17-  
156 255, Aa17-260, Aa17-154, and Aa17-166) were acquired via Illumina sequencing. Both the 3′  
157 and 5′ end sequences of the viral genomes revealed incomplete complementary sequences with  
158 differences at nucleotide residues 4, 5, and 12. The genomic sequences of PAPV-1 and -2 have  
159 been deposited in GenBank (Accession number: MT823459-MT823464).

#### 160 **Genomic organization of PAPVs**

161 The whole genomes of PAPV-1 and -2 were 19,716 and 17,475 nt in length, with GC contents  
162 of 39.96–40.09% and 37.34%, respectively. PAPV-1 contained a genome structure composed  
163 of eight genes in the order of 3′-N-P/V/C-M-F-SH-TM-G-L-5′, while the genome structure of  
164 PAPV-2 comprised seven genes in the order of 3′-N-P/V/C-M-F-TM-G-L-5′ (**Figure 2**). The  
165 N, M, F, G, and L genes encode one protein, while the P gene, in addition to the viral  
166 phosphoprotein, encodes some accessory proteins that arise through leaky scanning (C protein)  
167 or RNA editing (V/W protein). This RNA editing occurs through the addition of one or more  
168 guanine residues during transcription, following the recognition of a conserved RNA editing

169 site. PAPV-1 and -2 were found to possess a putative RNA editing site (TTAAAAAAGGCA)  
170 within their P gene. This sequence matched a conserved motif sequence (YTAAAARRGGCA)  
171 found in all members of the genera *Henipavirus* and *Morbillivirus*, as well as in JV, TaiV,  
172 BeiV, and other rodent paramyxoviruses. PAPV-1 showed additional open reading frames  
173 between the F and G genes, encoding an SH and/or TM protein. In contrast, PAPV-2 showed  
174 the TM gene but not the SH gene. The 3' leader and 5' trailer sequences were 55 and 28 nt in  
175 length, respectively. The gene start, stop, and intergenic region sequences of PAPVs are shown  
176 in the Table S4.

### 177 **Phylogenetic analysis of the novel PAPV strains**

178 Phylogenetic inference of the whole-genome sequences of PAPVs demonstrated two distinct  
179 genotypes within Jeilongviruses (**Figure 3**). The genetic cluster of PAPV-1 showed a high  
180 similarity (63.7–63.8%) with TaiV, while the PAPV-2 group shared a common ancestor with  
181 MMLV-1, with a genomic similarity of 71.6% (**Table S5**). In addition, the amino acid  
182 sequences of the individual coding proteins of PAPV-1 and -2 constituted comparable  
183 phylogenetic patterns with the viral RNA genome sequences (**Figure S2**). The partial L  
184 genomic sequences (14,287–14,725 nt) of novel PAPV strains phylogenetically belong to the  
185 genus *Jeilongvirus*, subfamily *Orthoparamyxovirinae*. Consistently, the phylogenies of PAPV  
186 formed two distinct genotypes compared to other Jeilongviruses. The PAPV-1 strains were  
187 closely related to TaiV, BeiV, and PMPV-1, whereas the PAPV-2 strains showed an  
188 independent genetic clustering with MMLV-1. The partial L gene sequences of PAPV-1 were  
189 differentiated into four genetic lineages (**Figure S3**). The genetic lineage I of PAPV-1  
190 originated geographically in Dongducheon, Paju, Pocheon, and Yeoncheon in Gyeonggi  
191 Province and Cheorwon in Gangwon Province. The genetic lineage II contained PAPV-1  
192 strains in Pocheon in Gyeonggi Province, Chuncheon in Gangwon Province, and Taean and  
193 Seosan in Chungcheongnam Province. Additionally, genetic lineage III was found in



194 Dongducheon and Paju in Gyeonggi Province, and in Hwacheon and Yanggu in Gangwon  
195 Province. A distinct strain from Changnyeong in Gyeongsangnam Province belonged to the  
196 genetic lineage IV. Further, the partial L gene sequences of PAPV-2 showed two phylogenetic  
197 clusters. Genetic lineage I included PAPV-2 in Yeoncheon, Paju, and Dongducheon, while  
198 genetic lineage II of PAPV-2 was observed in only Yeoncheon, Gyeonggi Province.

### 199 **Analysis of N-linked glycosylation (NLG) in the G protein of *Jeilongvirus***

200 To identify the glycosylation patterns of PAPV G proteins, potential NLG sites in the whole  
201 amino acid sequences were predicted using NetNglyc 1.0 (**Figure S4**). PAPV-1 contains 24  
202 NLGs in G proteins; 16/24 NLGs were potentially found at positions 56, 136, 175, 581, 770,  
203 805, 879, 925, 975, 985, 988, 994, 1,052, 1,070, 1,333, and 1,576 over the threshold value (0.5).  
204 The ten potential NLG sites from PAPV-2 were estimated, and six of the potential NLGs had  
205 significant values at positions 48, 355, 587, 620, 716, and 741. Additionally, the glycosylation  
206 pattern of PAPV-1 appeared similar to that of PMPV-1, while the G protein of PAPV-2 was  
207 glycosylated less frequently with respect to that of MMLV-1, BeiV, and JV.

### 208 **Domain structural analysis of PAPV-1 and -2 G proteins**

209 The primary sequences of PAPV-1 and -2 G proteins are quite different in their lengths. The G  
210 protein of PAPV-1 consists of approximately 1,600 amino acids, whereas that of PAPV-2  
211 consists of approximately 700 amino acids. The discrepancy between the two G proteins shows  
212 the differential components in the domain diagram (**Figure S5**). The PAPV-1 G protein  
213 contains NH (1–700 aa) and  $\beta$ -strand (1,200–1,600 aa) domains linked by a natively long  
214 disordered (DR) region (700–1,200 aa). In contrast, the PAPV-2 G protein has only the NH  
215 domain based on protein homology search and secondary structure predictions. Structure  
216 prediction and homology modelling indicated that the NH domains in both viruses were largely  
217 similar in their protein architecture. Notably, both PAPV-1 and -2 G proteins have a single TM  
218 domain in the NH domain. This indicates that the two additional domains in PAPV-1 G protein,

219 DR and  $\beta$ -strand domains, compared to those in PAPV-2 G protein, are most likely expressed  
220 as extracellular domains that may interact with host receptor proteins.

### 221 **Induction of type I/III IFN, ISGs, and proinflammatory cytokines of PAPV-1 in human** 222 **epithelial and endothelial cells**

223 PAPV-1 was successfully isolated from Vero E6 cells. To determine the infectivity and  
224 induction of antiviral genes in human epithelial and endothelial cells, A549 and HUVEC were  
225 infected with PAPV-1, respectively, during 1, 3, 5, and 7 days (**Figures 4 and 5**). The  
226 replication of PAPV-1 gradually increased at 1, 3, 5, and 7 days post-infection(dpi). The  
227 mRNA of *Ifn $\beta$* , *ISG15*, *Ifit2/Isq54*, and *Ifit1/Isq56* was upregulated by PAPV-1 infection at 3,  
228 5, and 7 dpi, while *Ifnl1/Il-29* was slightly induced at 7 dpi. The expression of the antiviral  
229 genes *Rsad2/Viperin* and *OAS1* increased during PAPV-1 infection, and the cytosolic sensors  
230 *Ddx58/Rig-I* and *Ifih1/Mda5* were upregulated at 3, 5, and 7 dpi. In addition, the induction of  
231 *Il-6* mRNA was observed in A549 and HUVEC at 3, 5, and 7 dpi. These results demonstrated  
232 that PAPV-1 indeed infected human epithelial and endothelial cells and induced the expression  
233 of innate antiviral genes including type I/III IFNs, ISGs, and proinflammatory cytokines.

234

### 235 **Discussion**

236 Here, we discovered and characterized two novel paramyxoviruses from *A. agrarius* (the  
237 striped field mouse) in the ROK. Whole-genome sequences of the paramyxoviruses were  
238 obtained using a combination of high-throughput and Sanger sequencing. The phylogenies of  
239 PAPV-1 and -2 demonstrated that these two viruses represent distinct genetic lineages within  
240 the genus *Jeilongvirus* and family *Paramyxoviridae*. The genome organization (3'-N-P/V/C-  
241 M-F-SH-TM-G-L-5') of these viruses was consistent with that of JV, BeiV, TaiV, and other  
242 rodent paramyxoviruses. The genomic characteristics and nucleotide length (19,716 nt) of the  
243 PAPV-1 genome are similar to those of PMPV-1, the largest group of rodent-borne

244 paramyxoviruses reported to date. This is attributed to the presence of *SH* and *TM* genes and the  
245 large size of the *G* gene. Additionally, the complete genome of PAPV-2 was 17,475 nt long,  
246 approximately 2 kb shorter than that of PAPV-1, owing to the lack of the *SH* and *TM* genes.  
247 According to the paramyxovirus species distinctive criterion (an amino acid distance of >7–  
248 7.5% in the L gene) (25), PAPV-1 and -2 were found to be sufficiently divergent to establish  
249 the new genus *Jeilongvirus*. These viruses have been suggested to constitute a separate genus  
250 within the family *Paramyxoviridae* (genus *Jeilongvirus*) based on their unique characteristics  
251 and evolutionary distance from other paramyxoviruses.

252 Recently, the host sharing of genetically distinct paramyxoviruses has been reported in nature  
253 (18, 26). MMLPV-1 and -2 co-infected in a kidney of a Rungwe brush-furred rat. The bank  
254 vole harbored PMPV-1 and bank vole virus (BaVV) in lung and kidney tissues. In this study,  
255 PAPV-1 and -2 were first discovered in the same host species, *A. agrarius* although they shared  
256 minimal similarity (nucleotide identities of 24.6–24.7%). Notably, paramyxoviruses shared a  
257 natural reservoir host with the virus strain belonged to the same family but a significantly  
258 distinct phylogenetic lineage, such as PAPV-1 and -2 in *A. agrarius*, MMLPV-1 and -2 in *L.*  
259 *machangui*, and PMPV-1 and BaVV in *M. glareolus*, respectively. These observations arise  
260 plausible hypotheses: 1) The virus may be evolved and emerged as a distinctive virus strain via  
261 genetic addition or deletion on its progenitor genome. 2) Two naturally distinct viruses might  
262 coexist in the same host, followed by competition or cooperation with each other. However,  
263 the preferential or predominant emergence of two distinct genotypes of rodent-borne  
264 paramyxoviruses awaits further investigation.

265 Genomic characteristics of paramyxoviruses affect pathogenicity and evolution within hosts  
266 (27). Moreover, the molecular prevalence of PAPV-1 was found to be higher than that of  
267 PAPV-2. These results led us to hypothesize that the different genome compositions of PAPV-  
268 1 and -2 determine their infectivity in nature. First, the SH protein plays a role in viral

269 pathogenicity by affecting the host immune response and membrane fusion mechanism (21-  
270 23). The SH protein found in paramyxoviruses, human metapneumovirus (HMPV), and JV  
271 modulates TNF- $\alpha$  production and blocks apoptosis *in vitro* and *in vivo*. Deficient SH expression  
272 enhances the secretion of proinflammatory cytokines IL-6 and IL-8 compared with that of the  
273 wild-type HMPV. The SH protein of HMPV also increases membrane permeability and fusion  
274 for viral entry (28). Intriguingly, PAPV-1 was found to possess the *SH* gene, while PAPV-2  
275 showed the absence of the gene. The presence of the *SH* gene may be correlated with the higher  
276 prevalence of PAPV-1 (10.6%) in natural hosts compared with that of PAPV-2 (2.6%), since  
277 the antagonistic function or increased viral entry promotes propagation in infected cells.  
278 Second, the G protein of paramyxoviruses is a predominant determinant of host specificity  
279 because it promotes cell entry by interacting with specific proteins on the surface of target cells  
280 (29, 30). Different paramyxovirus G proteins have evolved to allow optimal interaction and  
281 fusion with target cells in their respective hosts (31-36). The PAPV-1 G protein (1,602 amino  
282 acids) was shown to be considerably larger than the PAPV-2 G protein (826 amino acids). The  
283 G protein of PAPV-1 consists of the NH, DR, and  $\beta$ -strand domains, while the short length of  
284 the PAPV-2 G protein excludes the DR region. Intrinsically, disordered proteins may offer  
285 high flexibility to viral proteins either in the wholly or partially disordered form (37). The  
286 disordered protein of Zika virus conferred the capability for quick adaption in a changing  
287 environment, survival in host body environments, and invasion of the host defence mechanism  
288 (38). The characteristics of the DR region of the G protein may influence the higher prevalence  
289 of PAPV-1 compared to that of PAPV-2 in nature. Third, the NLG of G protein plays a role in  
290 protecting against neutralizing antibodies during cell-cell fusion and viral entry (39). The point  
291 mutation of potential NLG sites demonstrated that specific N-glycans in the NiV-G protein are  
292 significantly involved in viral entry. NLG in HIV-1 has been associated with survival and  
293 immune evasion, such as alteration of sensitivity to neutralizing antibody or reduction of

294 sensitivity to serum antibody (40-42). In the case of NiV, NLG is involved in the proper  
295 functioning of proteins and life cycle by having a dual role including enhancement of resistance  
296 to antibody neutralization and/or alternative reduction in membrane fusion and viral entry (43).  
297 Based on NLG prediction, the G protein of PAPV-1 was found to contain more potential  
298 glycosylation sites than that of PAPV-2. Although its precise function is still unclear, the  
299 potential glycosylation sites of this protein are thought to aid in shielding the protein from  
300 recognition by the host immune system. Thus, the biological consequences of the *SH* gene and  
301 molecular characteristics of G protein in PAPV-1 and -2 remain unexplored.

302 Infectivity and expression of innate antiviral genes significantly influence the pathological  
303 effects of viral infection in humans and mice (44-46). Due to the isolation of infectious particles,  
304 PAPV-1 was examined for infectivity and induction of innate antiviral genes using human  
305 epithelial and endothelial cells. We found that the replication of PAPV-1 increased at 1, 3, 5,  
306 and 7 dpi in A549 and HUVEC, respectively. The expression of type I/III IFNs, ISGs, and  
307 proinflammatory cytokines were also upregulated in response to PAPV-1. These observations  
308 suggest that PAPV-1 may infect and elicit proinflammatory responses in humans. In this study,  
309 PAPV-2 was not evaluated owing to the lack of infectious particles. The absence of the PAPV-  
310 2 *SH* gene might be involved in the robust induction of antiviral genes including type I IFNs  
311 and cytokines, and this might be responsible for the failure to isolate infectious PAPV-2  
312 particles. The comparisons of infectivity, immunogenicity, and pathogenesis between PAPV-  
313 1 and -2 remain to be investigated.

314 In conclusion, we presented two novel paramyxoviruses, PAPV-1 and -2, found in *A. agrarius*  
315 in the ROK. These viruses were identified as new Jeilongviruses within the family  
316 *Paramyxoviridae* using phylogenetic inference and genomic comparison with the nucleotide  
317 and protein sequences of all currently known paramyxovirus species. A total of 102 partial  
318 PAPV sequences (83 PAPV-1 and 19 PAPV-2) and six whole genome sequences (four PAPV-

319 1 and two PAPV-2) demonstrated the phylogenetic distribution and relationship of the novel  
320 paramyxoviruses in the ROK. PAPV-1 infected human cells and induced the expression of  
321 innate antiviral genes. Thus, this study provides profound insights into the molecular  
322 prevalence, virus-host interactions, and zoonotic potential of rodent-borne paramyxoviruses.  
323 Thus, these observations are expected to raise the awareness of physicians and scientists about  
324 the emergence of novel PAPV-1 and -2.

325

## 326 **Materials and Methods**

### 327 **Ethics statement**

328 The animal trapping procedure was approved by the US Forces Korea (USFK) in accordance  
329 with USFK Regulation 40–1 “Prevention, Surveillance, and Treatment of Hemorrhagic Fever  
330 with Renal Syndrome.” All procedures and handling of animals were conducted according to  
331 the protocol approved by the Korea University Institutional Animal Care and Use Committee  
332 (KUIACUC, #2016–0049).

### 333 **Animal trapping and PAPVs analyses**

334 Small mammals were captured from 2016 to 2018 using Sherman traps (8 × 9 × 23 cm; H. B.  
335 Sherman, Tallahassee, FL, USA). The trapping sites were located in Cheorwon, Chuncheon,  
336 Hongcheon, Hwacheon, Inje, Pyeongchang, and Yanggu in Gangwon Province; Dongducheon,  
337 Paju, Pocheon, Suwon, Uijeongbu, and Yeoncheon in Gyeonggi Province; Seosan and Taean  
338 in Chungcheongnam Province; and Changnyeong in Gyeongsangnam Province. The traps were  
339 set at intervals of 1–2 m and examined early the next morning over a period of 1–2 days. Live  
340 animals were humanely killed through cardiac puncture under alfaxalone-xylazine anaesthesia  
341 and identified to the species level using morphological criteria and PCR when required. A total  
342 of 913 rodent species, including 824 *A. agrarius*, 7 *A. peninsulae*, 10 *M. musculus*, 5 *Micromys*  
343 *minutus*, 58 *Myodes regulus*, 9 *Tscherskia triton*, and 158 shrew species were captured. Serum,

344 brain, lung, spleen, kidney, and liver tissues were collected aseptically and frozen at  $-80^{\circ}\text{C}$   
345 until use.

### 346 **Cell lines**

347 Vero E6 cells (ATCC, #DR-L2785), human lung adenocarcinoma cells (A549) (ATCC, #CCL-  
348 185), and human umbilical vein endothelial cells (HUVEC) (ATCC, #CRL1730) were  
349 purchased from ATCC. Vero E6, A549, and HUVEC were cultured in DMEM supplemented  
350 with Dulbecco's modified Eagle's medium (DMEM), 10% fetal bovine serum, 1 mM sodium  
351 pyruvate, 2 mL L-glutamine, and 50 mg/ml gentamicin. The cultures were incubated at  $37^{\circ}\text{C}$   
352 in a 5%  $\text{CO}_2$  incubator until use.

### 353 **Virus isolation**

354 Kidney tissues were ground in DMEM containing 5% fetal bovine serum. After centrifugation,  
355 the supernatant was inoculated into Vero E6 cells. After one and a half hours of adsorption, the  
356 excess inoculum was discarded, and the mixture was replaced with 5.5 mL of DMEM. The  
357 cultures were incubated at  $37^{\circ}\text{C}$  in a 5%  $\text{CO}_2$  incubator and inspected daily for cytopathic  
358 effects using inverted microscopy.

### 359 ***In vitro* infection**

360 A total of  $1 \times 10^6$  cells per well were prepared in a 6-well plate. After 24 h, the cells were infected  
361 with PAPV-1 at a multiplicity of infection of 0.02. The samples were then collected at 1, 3, 5,  
362 and 7 days post-infection. Detailed regarding cell lines are available in the supplementary  
363 method 4.

### 364 **Plaque assay**

365 Vero E6 cells were seeded onto 6-well plates at a density of  $1.5 \times 10^6$  cells per well. After  
366 overnight incubation at  $37^{\circ}\text{C}$ , the monolayer was washed twice with PBS and inoculated with  
367 10-fold serially diluted viruses. After 90 min of incubation at  $37^{\circ}\text{C}$  with constant shaking, the  
368 monolayer was overlaid with a 1:1 overlay medium and medium-melting-point agarose mix.

369 Additionally, following incubation at 37°C for 5 days, the agarose overlay was discarded. The  
370 plaques were visualized by staining the monolayer with 0.1% crystal violet in 10%  
371 formaldehyde.

### 372 **Electron microscopy**

373 Paramyxovirus-infected Vero E6 cells were collected at 7 days post-infection and fixed with  
374 2% paraformaldehyde and 2.5% glutaraldehyde with 0.1 M phosphate buffer, pH 7.4. Thin  
375 sections were placed onto 400-mesh square copper electron microscopy grids (Electron  
376 Microscopy Sciences) and viewed under a transmission electron microscope (Model H-7650;  
377 Hitachi, Japan).

### 378 **RNA extraction and RT-PCR**

379 Total RNA was extracted from the lung and kidney tissues of rodents using TRI Reagent  
380 Solution (AMBION Inc., Austin, Texas, USA). cDNA was synthesized using a high capacity  
381 RNA-to-cDNA kit (Applied Biosystems, Foster City, CA, USA). First, nested PCRs were  
382 performed in a 25- $\mu$ L reaction mixture containing 2.5 U of Ex Taq DNA polymerase (TaKaRa  
383 BIO Inc., Shiga, Japan), 2  $\mu$ g of cDNA, and 10 pM of each primer. The oligonucleotide primer  
384 sequences for the nested PCR were PAR-F (outer): 5'-ATG TAY GTB AGT GCW GAT GC-  
385 3', PAR-R1 (outer): 5'-AAC CAD TCW GTY CCR TCA TC-3', PAR-F and PAR-R2 (inner):  
386 5'-GCR TCR TCW GAR TGR TGD GCA A-3', and RES-MOR-HEN-F (outer): 5'-TGG GCW  
387 GCM AGT GC-3' and RES-MOR-HEN-R1 (outer): 5'-CCR CAD GCW GTR CAV CCW GT-  
388 3', RES-MOR-HEN-F and RES-MOR-HEN-R2 (inner): 5'-CTG GGT TAC AGC CCC AGC  
389 TAC-3' for the polymerase gene (47). Initial denaturation was performed at 95°C for 5 min,  
390 followed by 6 cycles of denaturation at 94°C for 30 sec, annealing at 37°C for 30 sec, and  
391 elongation at 72°C for 1 min; followed by 32 cycles of denaturation at 94°C for 30 sec,  
392 annealing at 42°C for 30 sec, and elongation at 72°C for 1 min (ProFlex PCR System, Life  
393 Technology, CA, USA). PCR products were purified using the LaboPass PCR purification kit



394 (Cosmo Genetech, Seoul, ROK), and sequencing was performed in both directions of each  
395 PCR product using a BigDye Terminator v3.1 Cycle Sequencing Kit (Applied Biosystems) on  
396 an automated sequencer (ABI 3730XL DNA Analyzer, Applied Biosystems).

#### 397 **Sequence-independent, single-primer amplification**

398 cDNA was generated from total RNA extracted from paramyxovirus-infected cells using  
399 FR26RV-N (5'-GCC GGA GCT CTG CAG ATA TCN NNN NN-3'). The reaction was  
400 performed in a 20- $\mu$ L reaction mixture containing 7  $\mu$ L total RNA, 2  $\mu$ L 10 pM of primer, 2  
401  $\mu$ L 5 $\times$  First strand buffer, 100 mM dithiothreitol, 25 mM MgCl<sub>2</sub>, 10 mM dNTPs, 0.5  $\mu$ L  
402 RNaseOUT, and 0.5  $\mu$ L Superscript III RTase (Life Technologies, Carlsbad, CA, USA) in a  
403 Proplex thermocycler (Life Technologies). The PCR conditions were as follows: 25°C for 10  
404 min, 50°C for 50 min, and 85°C for 10 min. Double-stranded (ds) cDNA was synthesized using  
405 0.2 units Klenow 3'→5'exo DNA polymerase (Enzymomics, Daejeon, ROK) and 1  $\mu$ L RNaseH  
406 (Invitrogen, San Diego, CA). The Klenow reaction mixture was incubated at 37°C for 1 hr and  
407 75°C for 15 min. The ds cDNA was purified using the MinElute PCR purification kit (Cat No.  
408 28004, Qiagen, Hilden, Germany). Using the FR20RV (5'-GCC GGA GCT CTG CAG ATA  
409 TC-3') primer, ds cDNA was amplified in a 50- $\mu$ L reaction mixture containing 10  $\mu$ L ds cDNA  
410 template, 10 pM primer, and 2 $\times$  My Taq Red (Bioline, Taunton, MA, USA). The PCR  
411 conditions were as follows: initial denaturation at 98°C for 30 sec, followed by 38 cycles of  
412 denaturation at 98°C for 10 sec, annealing at 54°C for 20 sec, and elongation at 72°C for 45  
413 sec.

#### 414 **NGS for Illumina MiSeq**

415 We prepared libraries using the TruSeq NAano DNA LT Sample Preparation Kit (Illumina,  
416 San Diego, CA, USA) according to the manufacturer's instructions. The samples were  
417 mechanically sheared using an M220 focused ultrasonicator (Covaris, Woburn, MA, USA).  
418 The cDNA amplicon was size-selected, A-tailed, ligated with indexes and adaptors, and

419 enriched. We sequenced libraries using the MiSeq benchtop sequencer (Illumina) with  $2 \times 150$   
420 bp and a MiSeq reagent V2 (Illumina).

#### 421 **NGS for Illumina HiSeq**

422 Total RNA was isolated using the Trizol reagent (AMBION). RNA quality was assessed using  
423 an Agilent 2100 bioanalyzer (Agilent Technologies, Amstelveen, The Netherlands), and RNA  
424 quantification was performed using the ND-2000 Spectrophotometer (Thermo Fisher Scientific,  
425 Waltham, MA, USA). Libraries were prepared from total RNA using the NEBNext Ultra II  
426 Directional RNA-Seq Kit (NEWENGLAND BioLabs, Ipswich, MA, UK). Additionally, the  
427 isolation of mRNA was performed using the Poly(A) RNA Selection Kit (LEXOGEN, Vienna,  
428 Austria). The isolated mRNAs were used for cDNA synthesis and shearing, following the  
429 manufacturer's instructions. Indexing was performed using Illumina indexes 1–12. The  
430 enrichment step was performed using PCR. Subsequently, the libraries were checked using the  
431 Agilent 2100 bioanalyzer (DNA High Sensitivity Kit) to evaluate the mean fragment size.  
432 Quantification was performed using a library quantification kit and StepOne Real-Time PCR  
433 System (Life Technologies). High-throughput sequencing was performed as paired-end 100  
434 sequencing using the HiSeq X10 system (Illumina).

#### 435 **NGS data analysis**

436 Adaptor and index sequences of reads were trimmed, and low-quality sequences were filtered  
437 using the CLC Genomics Workbench version 7.5.2 (CLC Bio, Cambridge, MA). The genome  
438 sequences of TaiV, BeiV, JV, MMLPV-1, and -2 were used in a reference mapping method.  
439 Read mapping to the reference genome sequence and extraction of consensus sequences were  
440 performed, and the genomic sequences of *Jeilongvirus* were deposited in GenBank (Accession  
441 number: MT823459-MT823464). The NGS outputs were analysed using our bioinformatics  
442 pipeline. The reads were trimmed with Trimmomatic (v0.36) to remove adapter sequences  
443 (48). To exclude the reads from the host genome, they were aligned against the host sequences

444 using Bowtie2 (v2.2.6), and only unaligned reads were used for the subsequent steps (49).  
445 Owing to the absence of the completely sequenced genome of the host species, only the  
446 complete mitochondrial sequence of the species on the NCBI RefSeq was used as a host  
447 reference (50). The remaining reads were filtered for quality using FaQCs (v0.11.5), and de-  
448 novo assembly was performed to produce contigs using SPAdes (v3.11.1) (51, 52). The  
449 assembled contigs were subsequently examined in a database consisting of complete viral  
450 genomes collected from the NCBI RefSeq database (updated in May 2018) using BLASTn  
451 (v2.6.0).

#### 452 **RACE PCR**

453 To obtain the 3' and 5' terminal genome sequences of paramyxovirus, we performed RACE  
454 PCR using a SMARTer® RACE 5'/3' Kit (Takara Bio), according to the manufacturer's  
455 specifications. We purified the PCR products using the LaboPass PCR Purification Kit (Cosmo  
456 Genetech). Sequencing was performed in both directions of each PCR product using the  
457 BigDye Terminator v3.1 Cycle Sequencing Kit (Applied Biosystems) on an automated  
458 sequencer (Applied Biosystems).

#### 459 **Phylogenetic analysis**

460 The viral genomic sequences were aligned and trimmed using the Clustal W tool in the  
461 Lasergene program version 5 (DNASTAR, USA), and multiple sequence alignment was  
462 performed with high accuracy and high throughput MUSCLE algorithms in MEGA 7.0 (53).  
463 Phylogenetic trees were constructed using the maximum likelihood method according to the  
464 best-fit substitution model. Support for the topologies was assessed using bootstrapping for  
465 1,000 iterations. In addition, the Bayesian inference method BEAST package (v1.10.4) was  
466 used, employing the Markov chain Monte Carlo (MCMC) method (54). The MCMC chain  
467 length was set to 100 million states by sampling every 50,000 states. Maximum clade

468 credibility trees were extracted using TreeAnnotator (v1.10.4) and prepared using FigTree  
469 (v1.4.0).

#### 470 **Analysis of potential NLG sites in the G gene**

471 Full-length amino acid sequences were submitted to the NetNlyc 1.0 (Kemitovet, Denmark)  
472 to predict the NLG sites of the G gene of Jeilongviruses (55).

#### 473 **Domain structural analysis**

474 To find homology, we ran NCBI BLASTP (<https://blast.ncbi.nlm.nih.gov/Blast.cgi>) using  
475 PAPV-1 and -2 G protein sequences against the NR database using default settings. When we  
476 ran BLASTP using PAPV-1 G protein and not PAPV-2 G protein, we found the alignments  
477 shown in the supplement covering both domains. To detect remote homologs and determine  
478 domain architecture, we ran an HHsearch (<https://toolkit.tuebingen.mpg.de/tools/hhpred>) using  
479 PAPV-1 and -2 sequences against PDB, ECOD, and Pfam databases (56, 57). To detect the  
480 domain boundaries and various sequence and/or structural features including secondary  
481 structure and disordered regions, we ran Quick2D  
482 (<https://toolkit.tuebingen.mpg.de/tools/quick2d>) using PAPV-1 G protein as a query. Finally,  
483 to confirm the domain architectures in the related G proteins, we ran Promals with default  
484 settings (58).

#### 485 **Statistical analysis**

486 Statistical analyses were performed as indicated in each figure using GraphPad Prism version  
487 5.00 for Windows (GraphPad Software, San Diego, California, USA; [www.graphpad.com](http://www.graphpad.com)).

488 **Acknowledgments and funding sources**

489 We thank Mr. Su-Am Kim for collecting wild rodents. This work was supported by the  
490 Research Program To Solve Social Issues of the National Research Foundation of Korea (NRF)  
491 funded by the Ministry of Science and Information and Communication Technology (ICT)  
492 (NRF-2017M3A9E4061992 and NRF-2019R1I1A2A01060902). In addition, this work was  
493 supported by the Agency for Defense Development (UE202026GD). Partial funding was  
494 provided by the Armed Forces Health Surveillance Division Global Emerging Infections  
495 Surveillance Branch (GEIS), ProMIS ID P0039\_18\_ME. The views expressed in this article  
496 are those of the author and do not necessarily reflect the official policy or position of the  
497 Department of the Army, Department of Defense, or the U.S. Government. Authors, as  
498 employees of the U.S. Government (TAK, HCK), conducted the work as part of their official  
499 duties. Title 17 U.S.C. §105 provides that ‘Copyright protection under this title is not available  
500 for any work of the United States Government.’ Title 17 U.S.C. §101 defines a U.S.  
501 Government work is a work prepared by an employee of the U.S. Government as part of the  
502 person’s official duties.

503

504 **Author Contributions**

505 S.H.L., J.S.N. designed study, collected, analyzed, and interpreted data, and wrote the  
506 manuscript. K.K. provided scientific discussion and data analyses. B.H.K., S.C. provided  
507 scientific discussion. H.C.K., T.A.K. captured small mammals. S.B., K.P., G.Y.L., H.S.C.,  
508 S.C., J.W.K., J.G.L., S.H.C. performed experiment and provided scientific discussion and  
509 review. C.S.U. provided scientific discussion and review. W.K.K., J.W.S. designed study,  
510 analyzed and interpreted data, wrote, reviewed, and revised the manuscript.

511

512 **Competing Interests statement**

513 The authors declare no competing financial interests.

514 **References**

- 515 1. Taylor LH, Latham SM, Woolhouse ME. 2001. Risk factors for human disease  
516 emergence. *Philos Trans R Soc Lond B Biol Sci* 356:983-9.
- 517 2. Woolhouse ME, Gowtage-Sequeria S. 2005. Host range and emerging and reemerging  
518 pathogens. *Emerg Infect Dis* 11:1842-7.
- 519 3. Johnson CK, Hitchens PL, Pandit PS, Rushmore J, Evans TS, Young CCW, Doyle  
520 MM. 2020. Global shifts in mammalian population trends reveal key predictors of virus  
521 spillover risk. *Proc Biol Sci* 287:20192736.
- 522 4. Kreuder Johnson C, Hitchens PL, Smiley Evans T, Goldstein T, Thomas K, Clements  
523 A, Joly DO, Wolfe ND, Daszak P, Karesh WB, Mazet JK. 2015. Spillover and  
524 pandemic properties of zoonotic viruses with high host plasticity. *Sci Rep* 5:14830.
- 525 5. Palmer SR, Soulsby L, Torgerson P, Brown DWG. 2011. *Oxford Textbook of*  
526 *Zoonoses Biology, Clinical Practice, and Public Health Control*  
527 doi:10.1093/med/9780198570028.001.0001. Oxford University Press.
- 528 6. Meerburg BG, Singleton GR, Kijlstra A. 2009. Rodent-borne diseases and their risks  
529 for public health. *Critical Reviews in Microbiology* 35:221-270.
- 530 7. Barzon L, Lavezzo E, Militello V, Toppo S, Palu G. 2011. Applications of next-  
531 generation sequencing technologies to diagnostic virology. *Int J Mol Sci* 12:7861-84.
- 532 8. Capobianchi MR, Giombini E, Rozera G. 2013. Next-generation sequencing  
533 technology in clinical virology. *Clin Microbiol Infect* 19:15-22.
- 534 9. Blomstrom AL. 2011. Viral metagenomics as an emerging and powerful tool in  
535 veterinary medicine. *Vet Q* 31:107-14.
- 536 10. Belak S, Karlsson OE, Blomstrom AL, Berg M, Granberg F. 2013. New viruses in  
537 veterinary medicine, detected by metagenomic approaches. *Vet Microbiol* 165:95-101.

- 538 11. Aguirre de Carcer D, Angly FE, Alcamí A. 2014. Evaluation of viral genome assembly  
539 and diversity estimation in deep metagenomes. *BMC Genomics* 15:989.
- 540 12. Williams SH, Che X, Garcia JA, Klena JD, Lee B, Muller D, Ulrich W, Corrigan RM,  
541 Nichol S, Jain K, Lipkin WI. 2018. Viral Diversity of House Mice in New York City.  
542 *mBio* 9.
- 543 13. Rima B, Balkema-Buschmann A, Dundon WG, Duprex P, Easton A, Fouchier R,  
544 Kurath G, Lamb R, Lee B, Rota P, Wang L, Ictv Report C. 2019. ICTV Virus  
545 Taxonomy Profile: Paramyxoviridae. *J Gen Virol* 100:1593-1594.
- 546 14. Thibault PA, Watkinson RE, Moreira-Soto A, Drexler JF, Lee B. 2017. Zoonotic  
547 Potential of Emerging Paramyxoviruses: Knowns and Unknowns. *Advances in Virus*  
548 *Research*, Vol 98 98:1-55.
- 549 15. Jack PJ, Boyle DB, Eaton BT, Wang LF. 2005. The complete genome sequence of J  
550 virus reveals a unique genome structure in the family Paramyxoviridae. *J Virol*  
551 79:10690-700.
- 552 16. Li Z, Yu M, Zhang H, Magoffin DE, Jack PJ, Hyatt A, Wang HY, Wang LF. 2006.  
553 Beilong virus, a novel paramyxovirus with the largest genome of non-segmented  
554 negative-stranded RNA viruses. *Virology* 346:219-28.
- 555 17. Woo PC, Lau SK, Wong BH, Wong AY, Poon RW, Yuen KY. 2011. Complete genome  
556 sequence of a novel paramyxovirus, Tailam virus, discovered in Sikkim rats. *J Virol*  
557 85:13473-4.
- 558 18. Vanmechelen B, Bletsas M, Laenen L, Lopes AR, Vergote V, Beller L, Deboutte W,  
559 Korva M, Avsic Zupanc T, Gouy de Bellocq J, Gryseels S, Leirs H, Lemey P, Vrancken  
560 B, Maes P. 2018. Discovery and genome characterization of three new Jeilongviruses,  
561 a lineage of paramyxoviruses characterized by their unique membrane proteins. *BMC*  
562 *Genomics* 19:617.



- 563 19. Jun MH, Karabatsos N, Johnson RH. 1977. A new mouse paramyxovirus (J virus). Aust  
564 J Exp Biol Med Sci 55:645-7.
- 565 20. Woo PCY, Lau SKP, Wong BHL, Wu Y, Lam CSF, Yuen KY. 2012. Novel Variant of  
566 Beilong Paramyxovirus in Rats, China. Emerging Infectious Diseases 18:1022-1024.
- 567 21. Bao X, Kolli D, Liu T, Shan Y, Garofalo RP, Casola A. 2008. Human metapneumovirus  
568 small hydrophobic protein inhibits NF-kappaB transcriptional activity. J Virol 82:8224-  
569 9.
- 570 22. Abraham M, Arroyo-Diaz NM, Li Z, Zengel J, Sakamoto K, He B. 2018. Role of Small  
571 Hydrophobic Protein of J Paramyxovirus in Virulence. J Virol 92.
- 572 23. Li Z, Xu J, Patel J, Fuentes S, Lin Y, Anderson D, Sakamoto K, Wang LF, He B. 2011.  
573 Function of the small hydrophobic protein of J paramyxovirus. J Virol 85:32-42.
- 574 24. Li Z, Xu J, Chen Z, Gao X, Wang LF, Basler C, Sakamoto K, He B. 2013. The L gene  
575 of J paramyxovirus plays a critical role in viral pathogenesis. J Virol 87:12990-8.
- 576 25. Drexler JF, Corman VM, Muller MA, Maganga GD, Vallo P, Binger T, Gloza-Rausch  
577 F, Cottontail VM, Rasche A, Yordanov S, Seebens A, Knornschild M, Oppong S, Adu  
578 Sarkodie Y, Pongombo C, Lukashev AN, Schmidt-Chanasit J, Stocker A, Carneiro AJ,  
579 Erbar S, Maisner A, Fronhoffs F, Buettner R, Kalko EK, Kruppa T, Franke CR, Kallies  
580 R, Yandoko ER, Herrler G, Reusken C, Hassanin A, Kruger DH, Matthee S, Ulrich  
581 RG, Leroy EM, Drosten C. 2012. Bats host major mammalian paramyxoviruses. Nat  
582 Commun 3:796.
- 583 26. Alkhovsky S, Butenko A, Eremyan A, Shchetinin A. 2018. Genetic characterization of  
584 bank vole virus (BaVV), a new paramyxovirus isolated from kidneys of bank voles in  
585 Russia. Arch Virol 163:755-759.
- 586 27. Samal SK. 2008. Paramyxoviruses of Animals. Encyclopedia of Virology  
587 doi:10.1016/B978-012374410-4.00460-X:40-47.

- 588 28. Masante C, El Najjar F, Chang A, Jones A, Moncman CL, Dutch RE. 2014. The human  
589 metapneumovirus small hydrophobic protein has properties consistent with those of a  
590 viroporin and can modulate viral fusogenic activity. *J Virol* 88:6423-33.
- 591 29. El Najjar F, Schmitt AP, Dutch RE. 2014. Paramyxovirus glycoprotein incorporation,  
592 assembly and budding: a three way dance for infectious particle production. *Viruses*  
593 6:3019-3054.
- 594 30. Navaratnarajah CK, Generous AR, Yousaf I, Cattaneo R. 2020. Receptor-mediated cell  
595 entry of paramyxoviruses: Mechanisms, and consequences for tropism and  
596 pathogenesis. *The Journal of biological chemistry* 295:2771-2786.
- 597 31. Ader N, Brindley MA, Avila M, Origgi FC, Langedijk JP, Orvell C, Vandeveld M,  
598 Zurbriggen A, Plemper RK, Plattet P. 2012. Structural rearrangements of the central  
599 region of the morbillivirus attachment protein stalk domain trigger F protein refolding  
600 for membrane fusion. *J Biol Chem* 287:16324-34.
- 601 32. Liu Q, Stone JA, Bradel-Tretheway B, Dabundo J, Benavides Montano JA, Santos-  
602 Montanez J, Biering SB, Nicola AV, Iorio RM, Lu X, Aguilar HC. 2013. Unraveling a  
603 three-step spatiotemporal mechanism of triggering of receptor-induced Nipah virus  
604 fusion and cell entry. *PLoS Pathog* 9:e1003770.
- 605 33. Ader-Ebert N, Khosravi M, Herren M, Avila M, Alves L, Bringolf F, Orvell C,  
606 Langedijk JP, Zurbriggen A, Plemper RK, Plattet P. 2015. Sequential conformational  
607 changes in the morbillivirus attachment protein initiate the membrane fusion process.  
608 *PLoS Pathog* 11:e1004880.
- 609 34. Bishop KA, Hickey AC, Khetawat D, Patch JR, Bossart KN, Zhu Z, Wang LF,  
610 Dimitrov DS, Broder CC. 2008. Residues in the stalk domain of the hendra virus g  
611 glycoprotein modulate conformational changes associated with receptor binding. *J*  
612 *Virol* 82:11398-409.

- 613 35. Bose S, Song AS, Jardetzky TS, Lamb RA. 2014. Fusion Activation through  
614 Attachment Protein Stalk Domains Indicates a Conserved Core Mechanism of  
615 Paramyxovirus Entry into Cells. *Journal of Virology* 88:3925-3941.
- 616 36. Bose S, Jardetzky TS, Lamb RA. 2015. Timing is everything: Fine-tuned molecular  
617 machines orchestrate paramyxovirus entry. *Virology* 479-480:518-31.
- 618 37. Mishra PM, Verma NC, Rao C, Uversky VN, Nandi CK. 2020. Intrinsically disordered  
619 proteins of viruses: Involvement in the mechanism of cell regulation and pathogenesis.  
620 *Progress in molecular biology and translational science* 174:1-78.
- 621 38. Giri R, Kumar D, Sharma N, Uversky VN. 2016. Intrinsically Disordered Side of the  
622 Zika Virus Proteome. *Front Cell Infect Microbiol* 6:144.
- 623 39. Biering SB, Huang A, Vu AT, Robinson LR, Bradel-Tretheway B, Choi E, Lee B,  
624 Aguilar HC. 2012. N-Glycans on the Nipah virus attachment glycoprotein modulate  
625 fusion and viral entry as they protect against antibody neutralization. *J Virol* 86:11991-  
626 2002.
- 627 40. Sagar M, Wu X, Lee S, Overbaugh J. 2006. Human immunodeficiency virus type 1 V1-  
628 V2 envelope loop sequences expand and add glycosylation sites over the course of  
629 infection, and these modifications affect antibody neutralization sensitivity. *J Virol*  
630 80:9586-98.
- 631 41. Wolk T, Schreiber M. 2006. N-Glycans in the gp120 V1/V2 domain of the HIV-1 strain  
632 NL4-3 are indispensable for viral infectivity and resistance against antibody  
633 neutralization. *Med Microbiol Immunol* 195:165-72.
- 634 42. Wei X, Decker JM, Wang S, Hui H, Kappes JC, Wu X, Salazar-Gonzalez JF, Salazar  
635 MG, Kilby JM, Saag MS, Komarova NL, Nowak MA, Hahn BH, Kwong PD, Shaw  
636 GM. 2003. Antibody neutralization and escape by HIV-1. *Nature* 422:307-12.

- 637 43. Aguilar HC, Matreyek KA, Filone CM, Hashimi ST, Levroney EL, Negrete OA,  
638 Bertolotti-Ciarlet A, Choi DY, McHardy I, Fulcher JA, Su SV, Wolf MC, Kohatsu L,  
639 Baum LG, Lee B. 2006. N-glycans on Nipah virus fusion protein protect against  
640 neutralization but reduce membrane fusion and viral entry. *J Virol* 80:4878-89.
- 641 44. Tripp RA, Oshansky C, Alvarez R. 2005. Cytokines and respiratory syncytial virus  
642 infection. *Proc Am Thorac Soc* 2:147-9.
- 643 45. Eaton BT, Broder CC, Middleton D, Wang LF. 2006. Hendra and Nipah viruses:  
644 different and dangerous. *Nat Rev Microbiol* 4:23-35.
- 645 46. Tapia K, Kim WK, Sun Y, Mercado-Lopez X, Dunay E, Wise M, Adu M, Lopez CB.  
646 2013. Defective viral genomes arising in vivo provide critical danger signals for the  
647 triggering of lung antiviral immunity. *PLoS Pathog* 9:e1003703.
- 648 47. Tong S, Chern SWW, Li Y, Pallansch MA, Anderson LJ. 2008. Sensitive and broadly  
649 reactive reverse transcription-PCR assays to detect novel paramyxoviruses. *Journal of*  
650 *Clinical Microbiology* 46:2652-2658.
- 651 48. Bolger AM, Lohse M, Usadel B. 2014. Trimmomatic: a flexible trimmer for Illumina  
652 sequence data. *Bioinformatics* 30:2114-20.
- 653 49. Langmead B, Salzberg SL. 2012. Fast gapped-read alignment with Bowtie 2. *Nat*  
654 *Methods* 9:357-9.
- 655 50. Pruitt KD, Tatusova T, Maglott DR. 2007. NCBI reference sequences (RefSeq): a  
656 curated non-redundant sequence database of genomes, transcripts and proteins. *Nucleic*  
657 *Acids Res* 35:D61-5.
- 658 51. Lo CC, Chain PS. 2014. Rapid evaluation and quality control of next generation  
659 sequencing data with FaQCs. *BMC Bioinformatics* 15:366.
- 660 52. Bankevich A, Nurk S, Antipov D, Gurevich AA, Dvorkin M, Kulikov AS, Lesin VM,  
661 Nikolenko SI, Pham S, Prjibelski AD, Pyshkin AV, Sirotkin AV, Vyahhi N, Tesler G,

- 662           Alekseyev MA, Pevzner PA. 2012. SPAdes: a new genome assembly algorithm and its  
663           applications to single-cell sequencing. *J Comput Biol* 19:455-77.
- 664   53.    Kumar S, Stecher G, Tamura K. 2016. MEGA7: Molecular Evolutionary Genetics  
665           Analysis Version 7.0 for Bigger Datasets. *Molecular Biology and Evolution* 33:1870-  
666           1874.
- 667   54.    Suchard MA, Lemey P, Baele G, Ayres DL, Drummond AJ, Rambaut A. 2018.  
668           Bayesian phylogenetic and phylodynamic data integration using BEAST 1.10. *Virus*  
669           Evol 4:vey016.
- 670   55.    Gavel Y, von Heijne G. 1990. Sequence differences between glycosylated and non-  
671           glycosylated Asn-X-Thr/Ser acceptor sites: implications for protein engineering.  
672           *Protein Eng* 3:433-42.
- 673   56.    Zimmermann L, Stephens A, Nam S-Z, Rau D, Kübler J, Lozajic M, Gabler F, Söding  
674           J, Lupas AN, Alva V. 2018. A Completely Reimplemented MPI Bioinformatics Toolkit  
675           with a New HHpred Server at its Core. *Journal of Molecular Biology* 430:2237-2243.
- 676   57.    Steinegger M, Meier M, Mirdita M, Vöhringer H, Haunsberger SJ, Söding J. 2019. HH-  
677           suite3 for fast remote homology detection and deep protein annotation. *BMC*  
678           Bioinformatics 20:473.
- 679   58.    Pei J, Grishin NV. 2007. PROMALS: towards accurate multiple sequence alignments  
680           of distantly related proteins. *Bioinformatics* 23:802-8.

681 **Figure Legends**

682 **Figure 1. An electron microscopic image and the plaque assay of Paju Apodemus**  
683 **paramyxovirus 1 (PAPV-1)**

684 (A) PAPV-1 was imaged using transmission electron microscopy (TEM). (B) Photograph of a  
685 representative plaque assay plate of PAPV-1 inoculated into Vero E6 cells at 5 days post-  
686 infection. This single plate represents dilutions (from top-left to right: undiluted and dilutions  
687 at  $1:10^1$ ,  $1:10^2$ , and bottom-left to right: dilutions at  $1:10^3$ ,  $1:10^4$ ,  $1:10^5$ ) of the virus that mostly  
688 destroys the cell monolayer, producing the appropriate number of plaques to count.

689 **Figure 2. Organization of the genomes of Paju Apodemus paramyxoviruses 1 and 2**

690 The genomic configurations of different paramyxoviruses are shown. The genome of  
691 paramyxovirus constitutes 8 to 9 coding regions, 3' NP-C-P-M-F-SH-TM-G-HN-H-L 5'. The  
692 color boxes represent coding regions for each gene; N, yellow; C, sky blue; P, blue; M, viridian;  
693 F, green; SH, yellow green; TM, orange; G, red; HN, light yellow; H, Chilean pink, and L,  
694 purple. The genome size scale is provided at the bottom. Adobe Illustrator CS6  
695 (<http://www.adobe.com/products/illustrator.html>) was used to construct the figures.

696 **Figure 3. Phylogenetic tree constructed based on the whole-genome sequences of Paju**  
697 **Apodemus paramyxoviruses and other paramyxoviruses**

698 Phylogenetic analysis based on the whole-genome sequences of the Paju Apodemus  
699 paramyxoviruses. Evolutionary relationships were inferred using BEAST (v1.10.4) with  
700 default priors and assuming homochromous tips. The Markov chain Monte Carlo analysis  
701 was performed until adequate sample sizes (ESS >200) were obtained, and TreeAnnotator  
702 (v2.5.4) was used to summarize the maximum clade credibility tree from the posterior tree  
703 distribution, using a 10% burn-in. *Paramyxoviridae* strains served as reference sequences for  
704 the phylogenetic analysis. Red color indicates PAPV-1, and blue indicates PAPV-2.

705 **Figure 4. Replication of PAPV-1 and the induction of innate antiviral genes in human**  
706 **epithelial cell (A549)**

707 A549 cells were infected with a multiplicity of infection of 0.02 of PAPV-1. Total RNA was  
708 analysed via qRT-PCR and examined for the expression of (A) PAPV-1 *RdRp* gene, (B) *Ifnβ*,  
709 (C) *Ifnl1/Il-29*, (D) *ISG15*, (E) *Ifit2/Isg54*, (F) *Ifit1/Isg56*, (G) *Rsad2/Viperin*, (H) *OAS1*, (I)  
710 *Ddx58/Rig-I*, (J) *Ifih1/Mda5*, and (K) *Il-6* at 1, 3, 5, and 7 days post-infection. Error bars  
711 indicate the standard deviation of triplicate measurements in a representative experiment.  
712 (\* $p < 0.05$ ; \*\*\* $p < 0.001$ , unpaired student t-test; ns: non-significant).

713 **Figure 5. Replication of PAPV-1 and the induction of innate antiviral genes in human**  
714 **endothelial cells (HUVEC)**

715 HUVECs were infected with a multiplicity of infection of 0.02 of PAPV-1. Total RNA was  
716 analysed via qRT-PCR and examined for the expression of (A) PAPV-1 *RdRp* gene, (C)  
717 *Ifnl1/Il-29*, (D) *ISG15*, (E) *Ifit2/Isg54*, (F) *Ifit1/Isg56*, (G) *Rsad2/Viperin*, (H) *OAS1*, (I)  
718 *Ddx58/Rig-I*, (J) *Ifih1/Mda5*, and (K) *Il-6* at 1, 3, 5, and 7 days post-infection. Error bars  
719 indicate the standard deviation of triplicate measurements in a representative experiment.  
720 (\* $p < 0.05$ ; \*\*\* $p < 0.001$ , unpaired student t-test; ns: non-significant).

721 **Table**

722 **Table 1. Prevalence of paramyxovirus infection based on Paju Apodemus**  
 723 **paramyxoviruses (PAPVs) captured from 2016 to 2018 in the Republic of Korea**

| Year         | Provinces      | City        | Number of<br><i>A. agrarius</i><br>captured | RNA positivity (%) <sup>*</sup> |                      |                        |
|--------------|----------------|-------------|---------------------------------------------|---------------------------------|----------------------|------------------------|
|              |                |             |                                             | PAPV-1                          | PAPV-2               | Total                  |
| 2016         | Gangwon        | Cheorwon    | 12                                          | 1/12 (8.3%)                     | 0/12                 | <b>1/12 (8.3%)</b>     |
|              |                | Hwacheon    | 42                                          | 1/42 (2.4%)                     | 0/42                 | <b>1/42 (2.4%)</b>     |
|              |                | Inje        | 44                                          | 0/44                            | 0/44                 | <b>0/44</b>            |
|              | Gyeonggi       | Paju        | 26                                          | 0/26                            | 0/26                 | <b>0/26</b>            |
|              |                | Pocheon     | 41                                          | 2/41 (4.9%)                     | 0/41                 | <b>2/41 (4.9%)</b>     |
|              |                | Yeoncheon   | 25                                          | 1/25 (4.0%)                     | 1/25 (4.0%)          | <b>2/25 (8.0%)</b>     |
| Subtotal     |                |             | 190                                         | 5/190 (2.6%)                    | 1/190 (0.5%)         | <b>6/190 (3.2%)</b>    |
| 2017         | Gangwon        | Cheorwon    | 49                                          | 7/49 (14.3%)                    | 3/49 (6.1%)          | <b>10/49 (20.4%)</b>   |
|              |                | Hwacheon    | 55                                          | 15/55 (27.3%)                   | 0/55                 | <b>15/55 (27.3%)</b>   |
|              |                | Chuncheon   | 100                                         | 8/100 (8.0%)                    | 1/100 (1.0%)         | <b>9/100 (9.0%)</b>    |
|              | Gyeonggi       | Paju        | 79                                          | 18/79 (22.8%)                   | 1/79 (1.3%)          | <b>19/79 (24.1%)</b>   |
|              |                | Pocheon     | 33                                          | 6/33 (18.2%)                    | 2/33 (6.1%)          | <b>8/33 (24.2%)</b>    |
|              |                | Yeoncheon   | 95                                          | 12/95 (12.6%)                   | 9/95 (9.5%)          | <b>21/95 (22.1%)</b>   |
|              |                | Dongducheon | 28                                          | 5/28 (17.9%)                    | 0/28                 | <b>5/28 (17.9%)</b>    |
|              |                | Uijeongbu   | 3                                           | 0/3                             | 0/3                  | <b>0/3</b>             |
|              | Chungcheongnam | Seosan      | 12                                          | 1/12 (8.3%)                     | 0/12                 | <b>1/12 (8.3%)</b>     |
|              |                | Taeon       | 11                                          | 4/11 (36.4%)                    | 0/11                 | <b>4/11 (36.4%)</b>    |
|              | Gyeongsangnam  | Changnyeong | 6                                           | 1/6 (16.7%)                     | 0/6                  | <b>1/6 (16.7%)</b>     |
| Subtotal     |                |             | 471                                         | 77/471 (16.3%)                  | 16/471 (3.4%)        | <b>93/471 (19.7%)</b>  |
| 2018         | Gangwon        | Cheorwon    | 3                                           | 1/3 (33.3%)                     | 0/3                  | <b>1/3 (33.3%)</b>     |
|              |                | Chuncheon   | 24                                          | 0/24                            | 0/24                 | <b>0/24</b>            |
|              |                | Yanggu      | 29                                          | 2/29 (6.9%)                     | 0/29                 | <b>2/29 (6.9%)</b>     |
|              | Gyeonggi       | Paju        | 34                                          | 1/34 (2.9%)                     | 2/34 (5.9%)          | <b>3/34 (8.8%)</b>     |
|              |                | Pocheon     | 40                                          | 0/40                            | 2/40 (5.0%)          | <b>2/40 (5.0%)</b>     |
|              |                | Yeoncheon   | 31                                          | 1/31 (3.2%)                     | 0/31                 | <b>1/31 (3.2%)</b>     |
|              |                | Suwon       | 2                                           | 0/2                             | 0/2                  | <b>0/2</b>             |
| Subtotal     |                |             | 163                                         | 5/163 (3.1%)                    | 4/163 (2.4%)         | <b>9/163 (5.5%)</b>    |
| <b>Total</b> |                |             | <b>824</b>                                  | <b>87/824 (10.6%)</b>           | <b>21/824 (2.6%)</b> | <b>108/824 (13.1%)</b> |

724 <sup>\*</sup>The positive rate of PAPV RNA indicates the detection of the partial L segment, targeting  
 725 pan-*Orthoparamyxovirinae* and/or the genera *Respirovirus*, *Morbillivirus*, and *Henipavirus*  
 726 using RT-PCR and Sanger sequencing.

727  
 728  
 729  
 730  
 731  
 732  
 733  
 734  
 735



736 **Figures**

737 **Figure 1.**

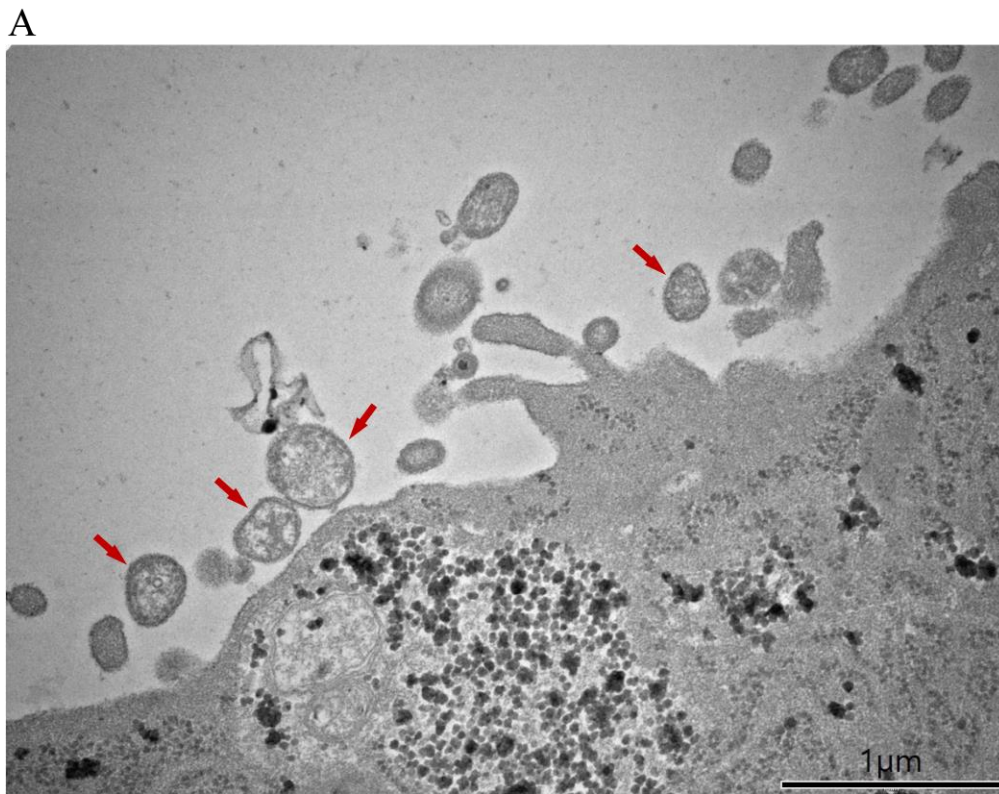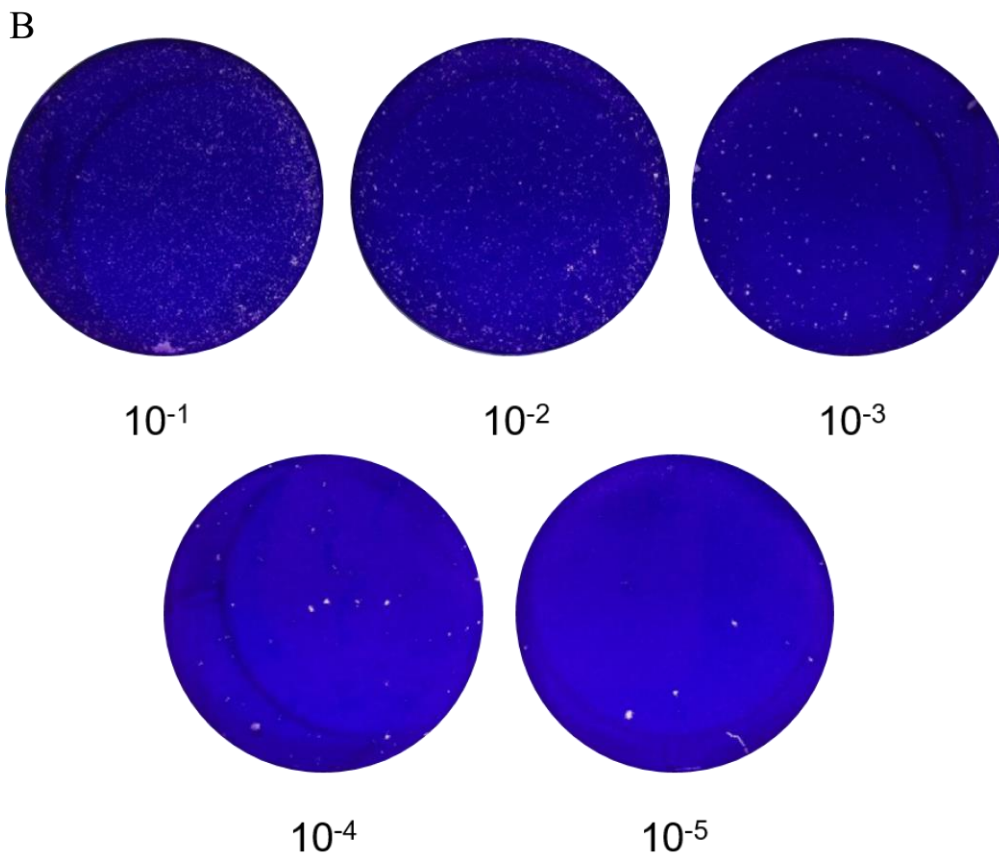

738

739 **Figure 2.**

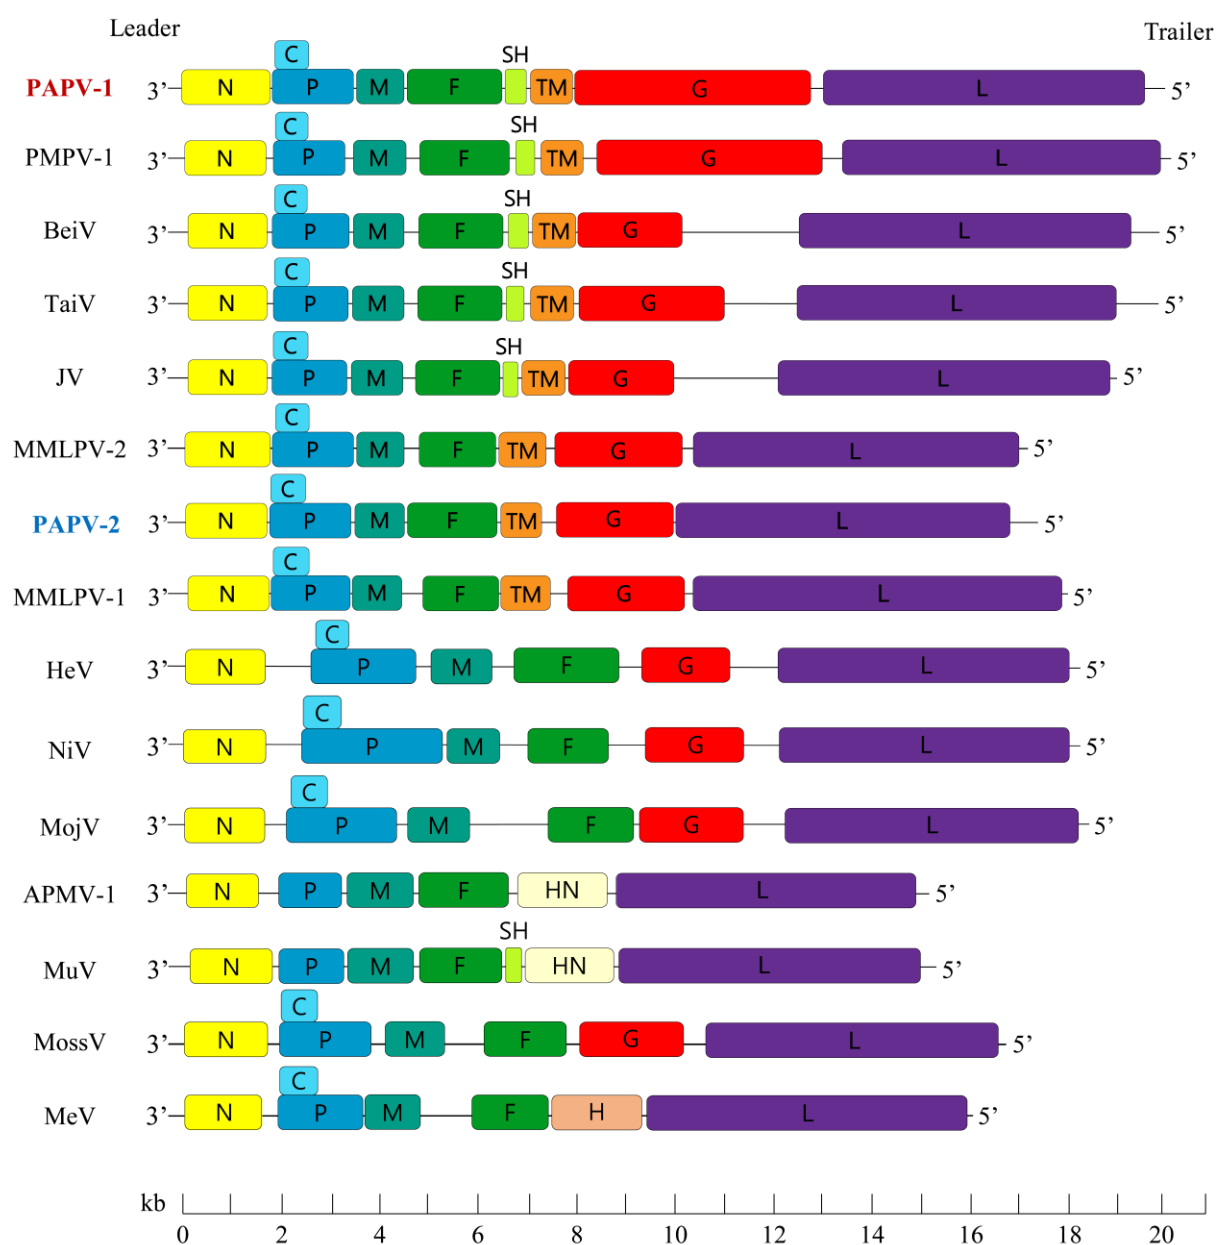

740

741

742

743

744

745

746

747 **Figure 3.**

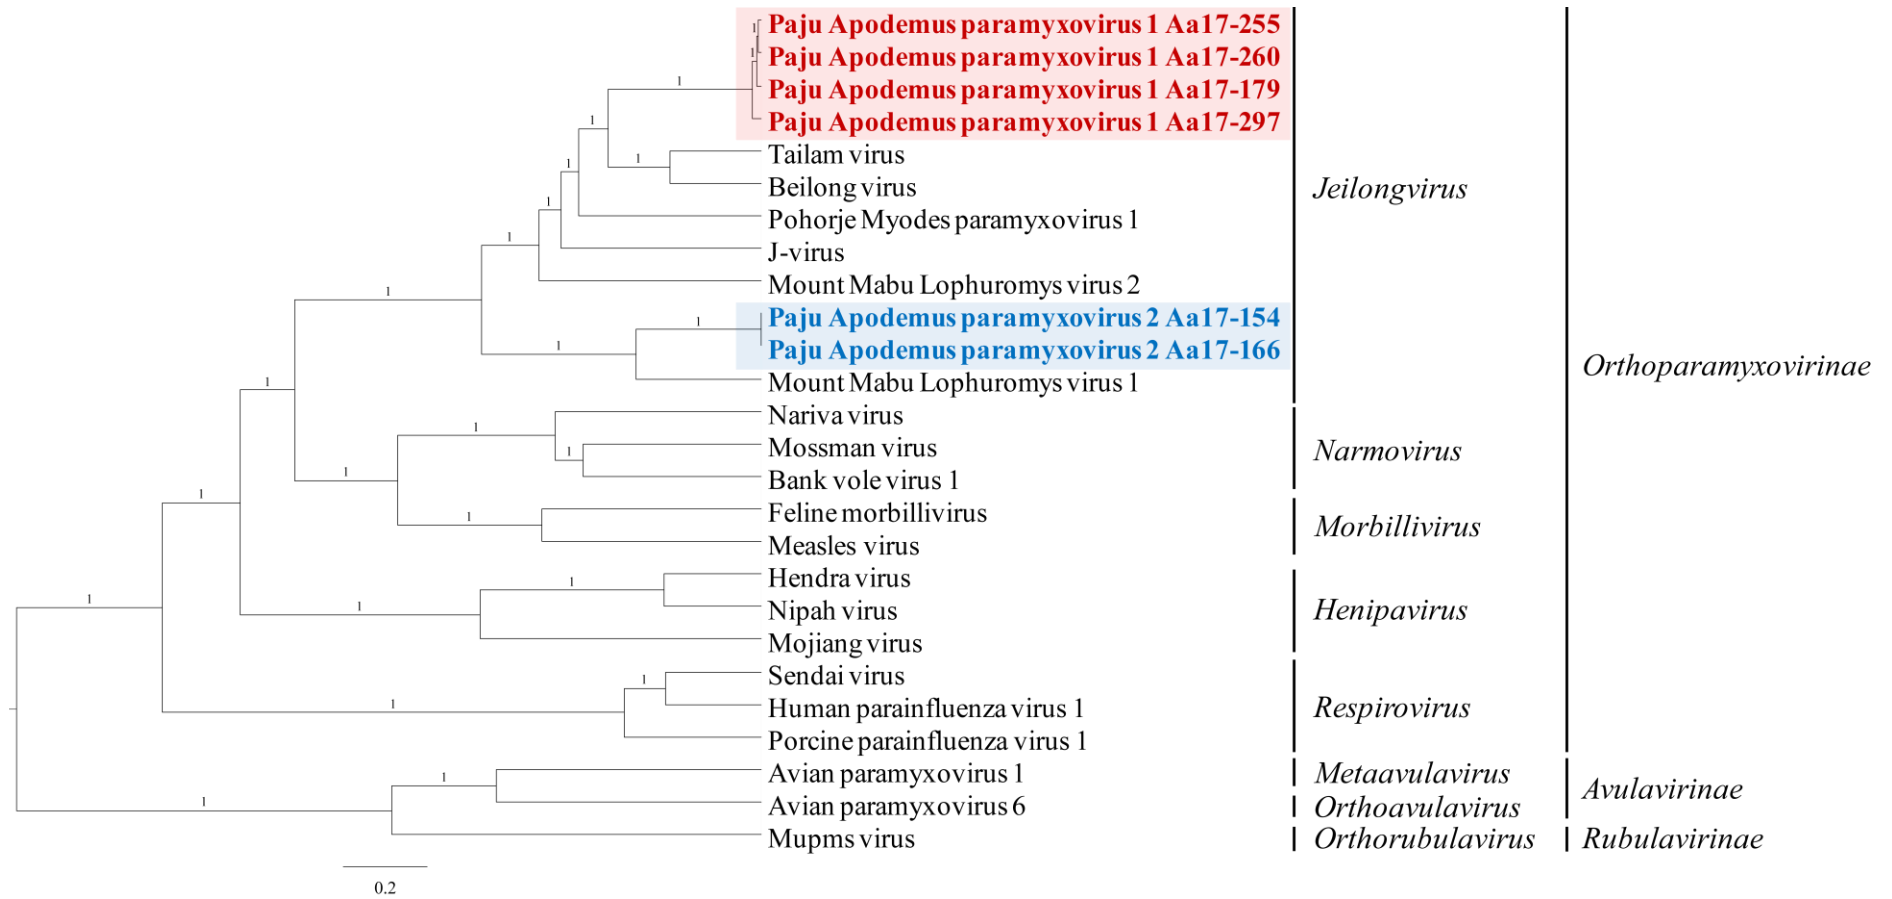

748

749

750  
751

**Figure 4.**

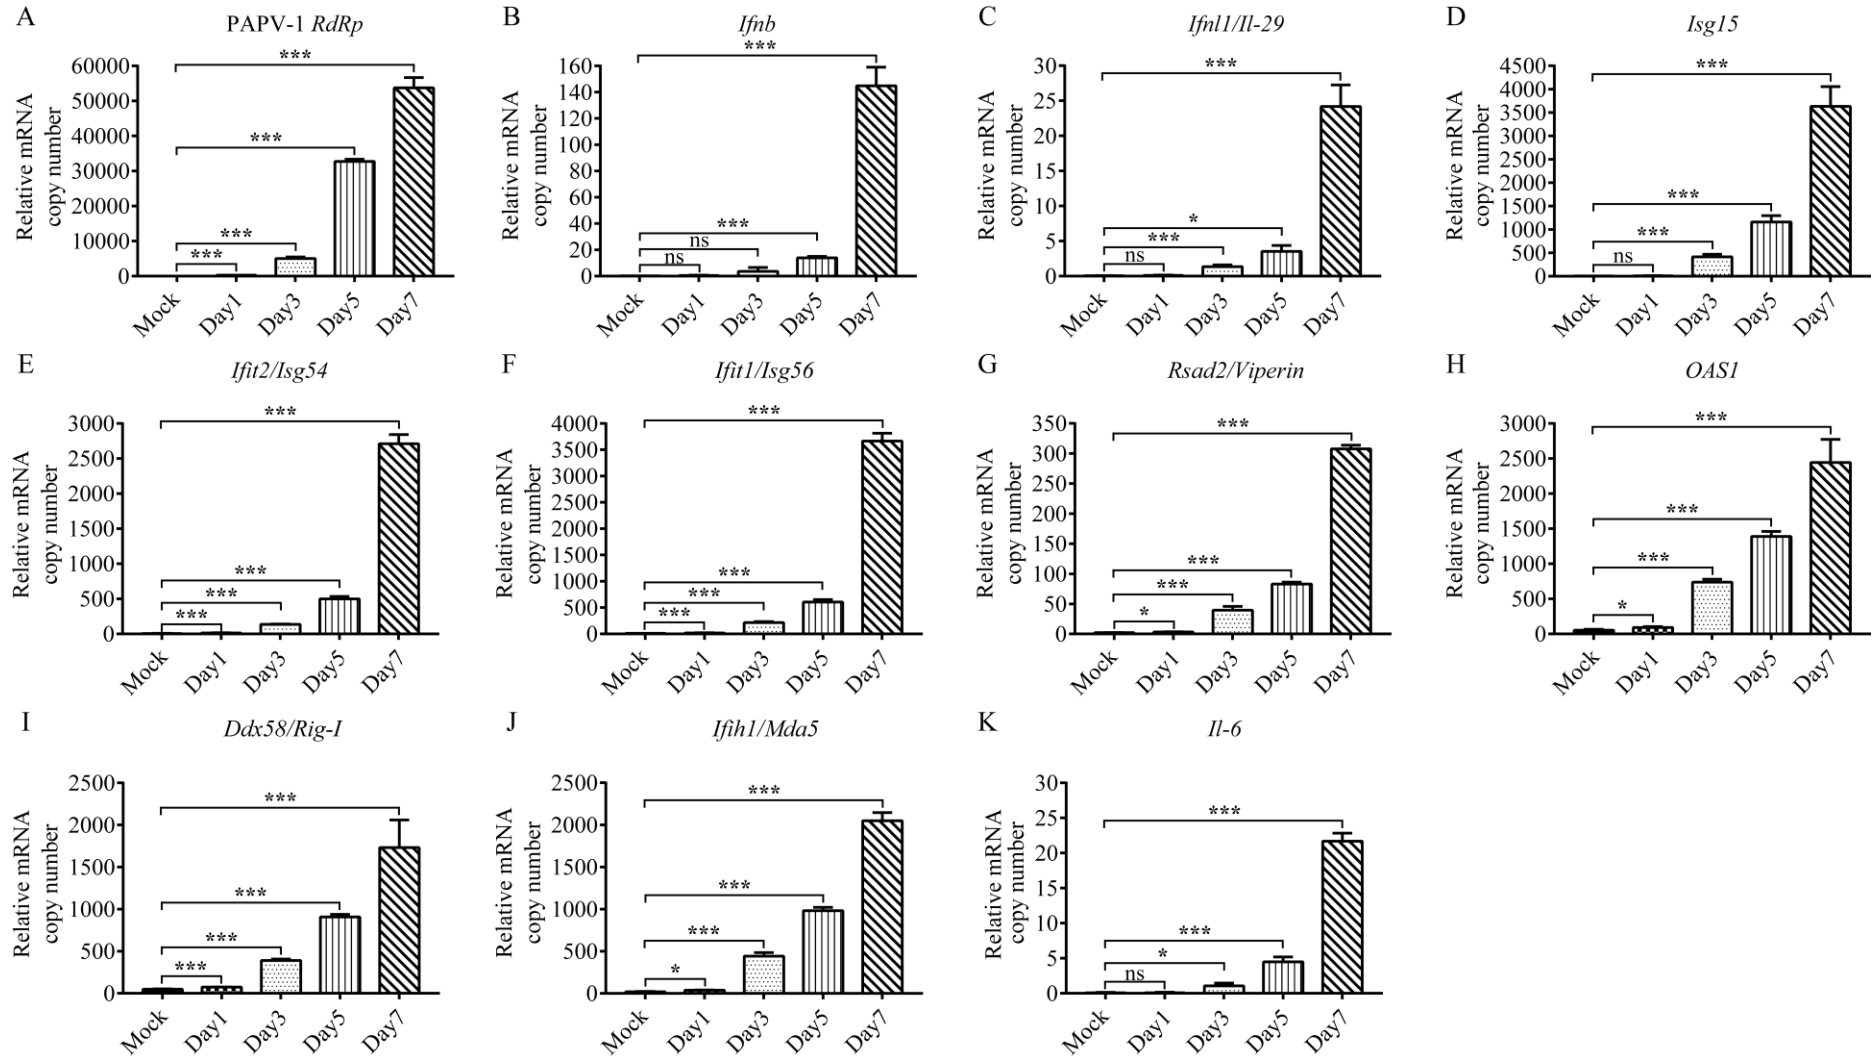

752

753

**Figure 5.**

754

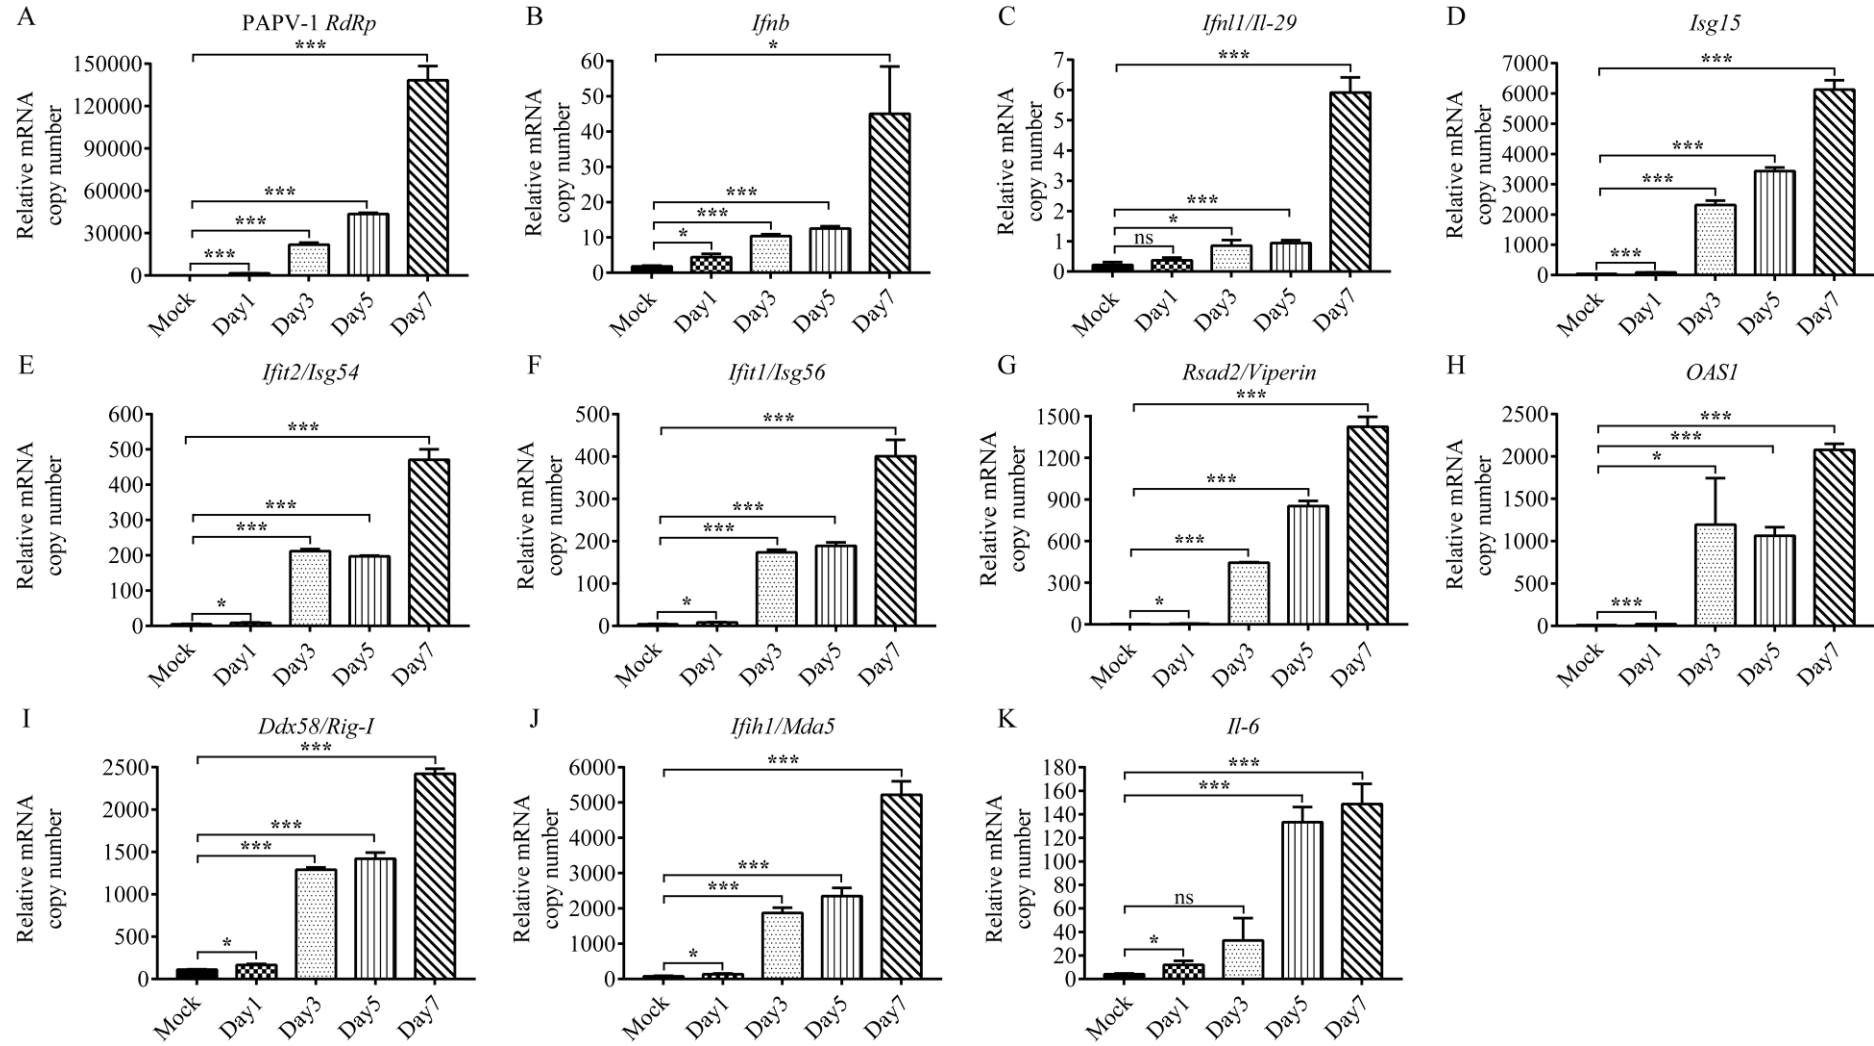

755

756
